# Supplementary material for: Fluorescent robust photoactuator via photo-crosslinking induced single-layered janus polyimide
Source: PubMed Central journal article supplement — Nat Commun. 2024 Nov 21;15:10084. doi: 10.1038/s41467-024-54386-9 (PMC11582805; doi:10.1038/s41467-024-54386-9), 2024-11-21
Supplement: 41467_2024_54386_MOESM3_ESM.pdf [file 41467_2024_54386_MOESM3_ESM.pdf]

### **Description of Additional supplementary files**

**Supplementary Movie 1:** Reversible actuation of PI actuator driven by UV light.

**Supplementary Movie 2:** Robot crawling forward on a ratcheted substrate upon on-off UV light illumination cycles.

**Supplementary Movie 3:** Fluorescent robot crawling forward in dark.

**Supplementary Movie 4:** Robot crawling up a ratcheted substrate at a 15° incline.

**Supplementary Movie 5:** Fluorescence patterned actuator simultaneously showing reversible actuation and exhibiting pattern upon turning on and off the UV light.

**Supplementary Movie 6:** Actuator performing different motions when stimulated at different locations.

**Supplementary Movie 7:** Actuator showing the ability of weightlifting.

**Supplementary Movie 8:** Actuator showing the ability of throwing object.

**Supplementary Movie 9:** Actuator showing the ability of transporting object.

**Supplementary Movie 10:** Actuator showing the ability of leaping
